# Supplementary material
Source: MDPI journal article supplement (https://www.mdpi.com/2073-4395/12/10/2269)
Supplement: s1 [file s1 › Table S3.pdf]

Table S3 Spectral data of various light treatments of pepper seedlings

| PPFD ( $\mu\text{molm}^{-2}\text{s}^{-1}$ ) | CK     | B30    | B60    | UVA2   | UVA6   | FR20   | FR30   |
|---------------------------------------------|--------|--------|--------|--------|--------|--------|--------|
| PPFD (400~700 nm)                           | 203.77 | 198.67 | 201.46 | 198.5  | 201.13 | 197.56 | 195.93 |
| UV-A(380~399nm)                             | 0.13   | 0.14   | 0.29   | 1.95   | 6.66   | 0.18   | 0.10   |
| Blue (400~499 nm)                           | 36.73  | 58.98  | 85.26  | 34.3   | 37.77  | 34.90  | 34.30  |
| Green (500~599 nm)                          | 47.19  | 46.93  | 39.04  | 52.98  | 47.30  | 53.72  | 53.42  |
| Red (600~699 nm)                            | 119.83 | 92.74  | 77.154 | 111.21 | 116.05 | 108.92 | 108.20 |
| Far red (700~800 nm)                        | 3.67   | 3.01   | 2.49   | 3.98   | 4.03   | 21.91  | 33.55  |
| YPFD (400~700 nm)                           | 179.94 | 172.12 | 170.25 | 176.81 | 176.99 | 175.14 | 173.79 |
| R:FR                                        | 32.61  | 30.76  | 30.94  | 27.90  | 28.79  | 4.97   | 3.22   |
| R:B                                         | 3.26   | 1.57   | 0.90   | 3.24   | 3.07   | 3.12   | 3.15   |
